# Supplementary material
Source: PubMed Central journal article supplement (PMC10358014)

# MDA-MB-231

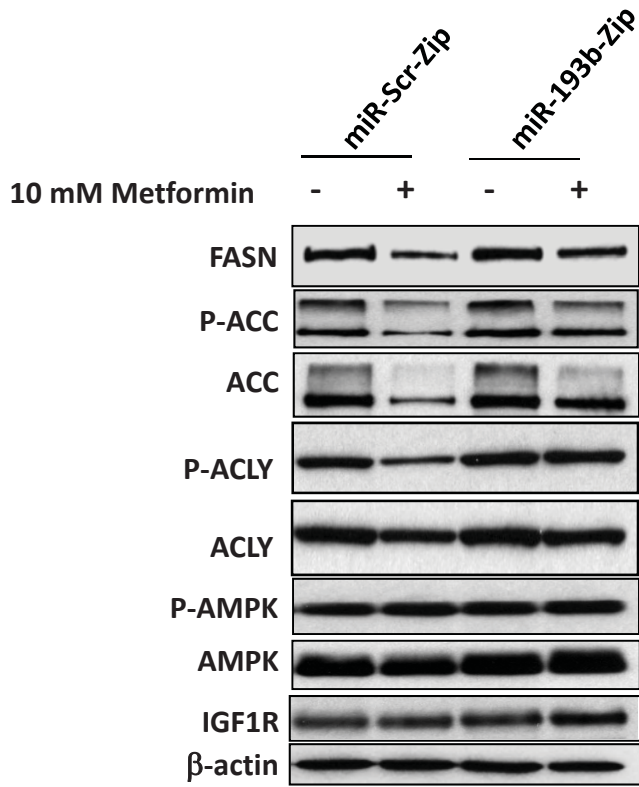

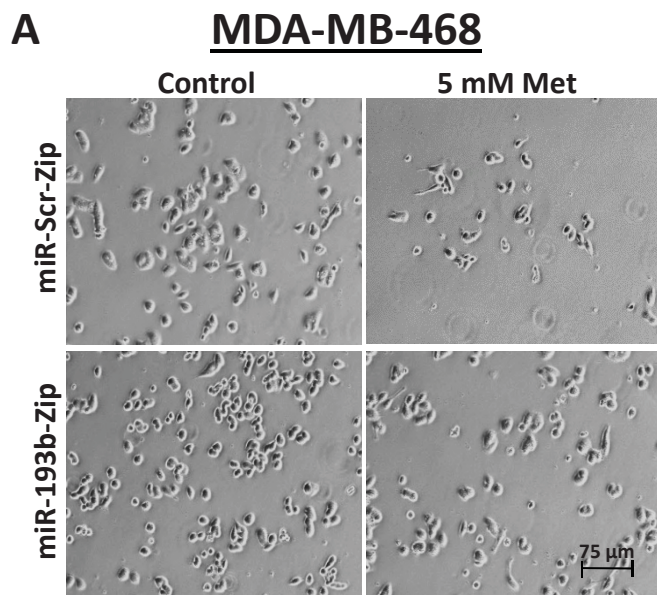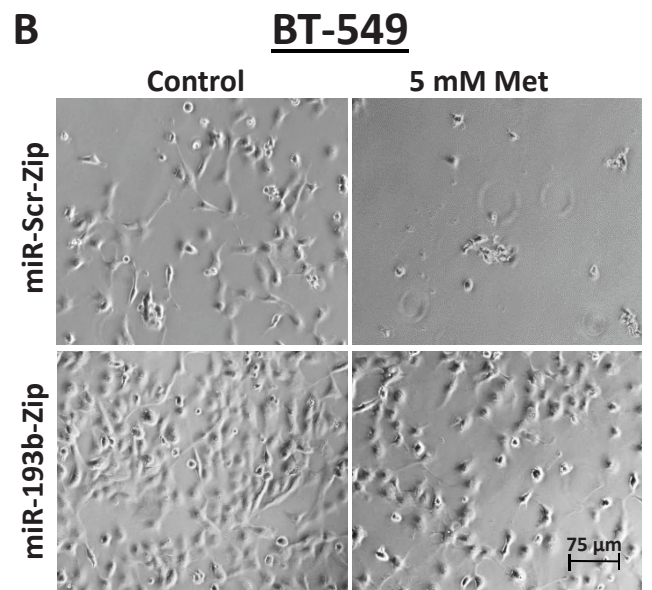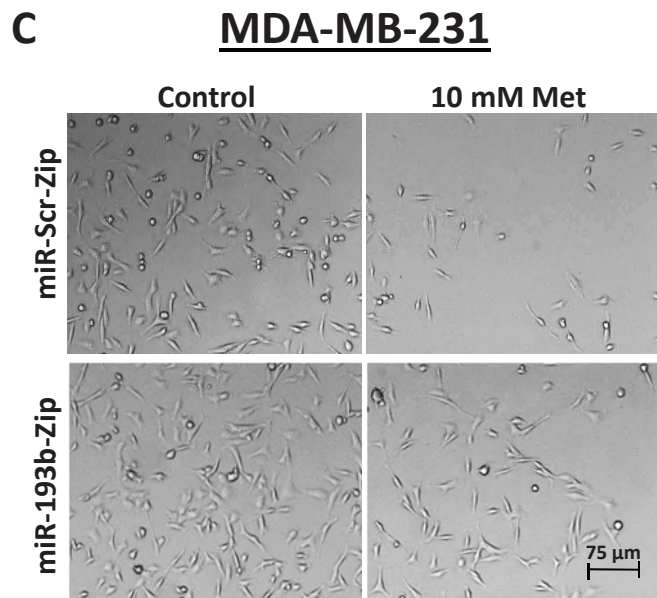

**A**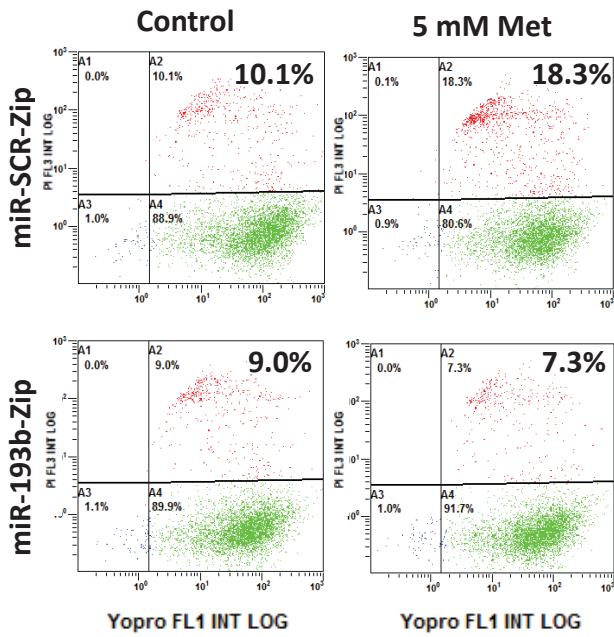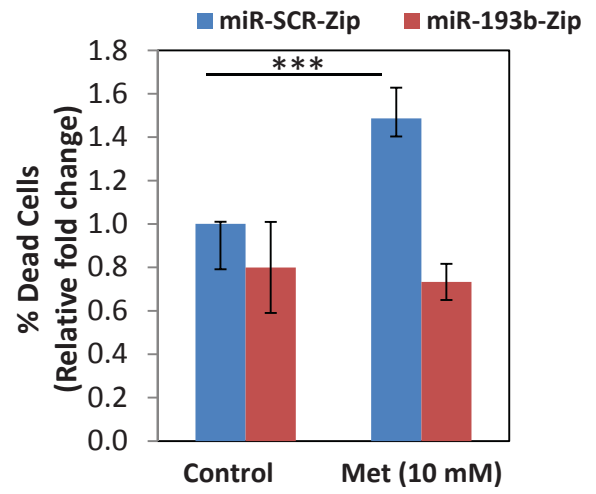**B**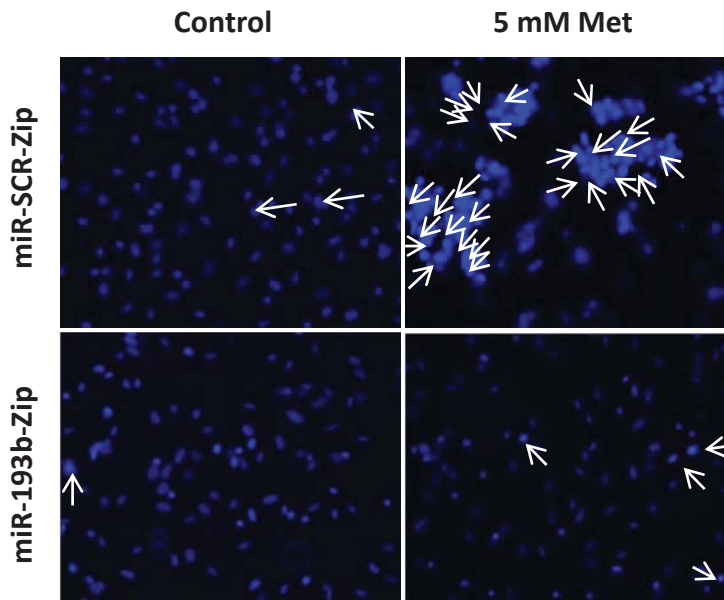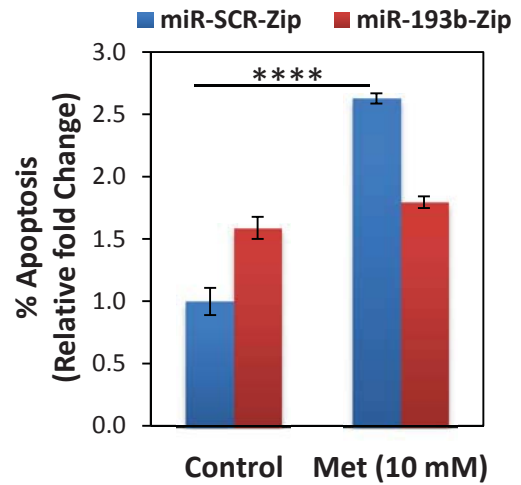

**A**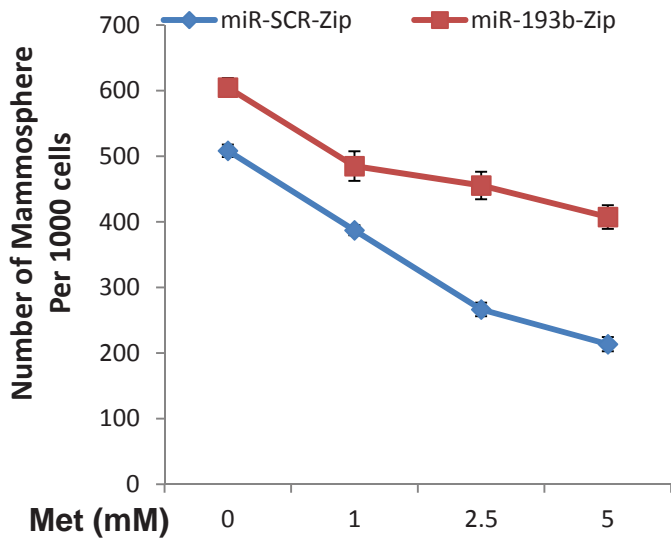**B**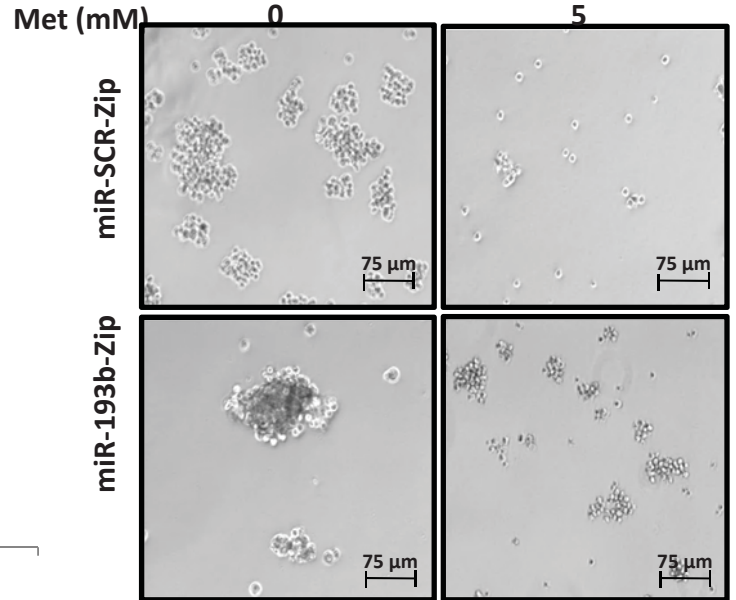**C**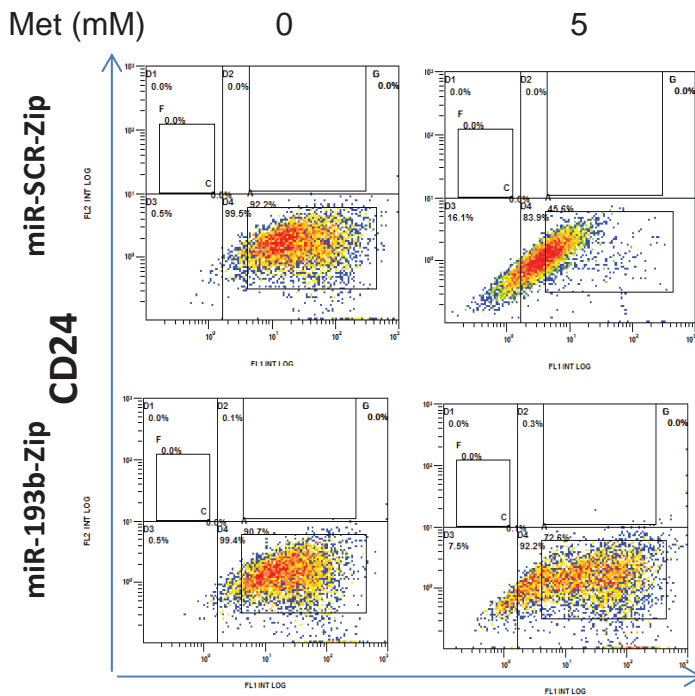**D**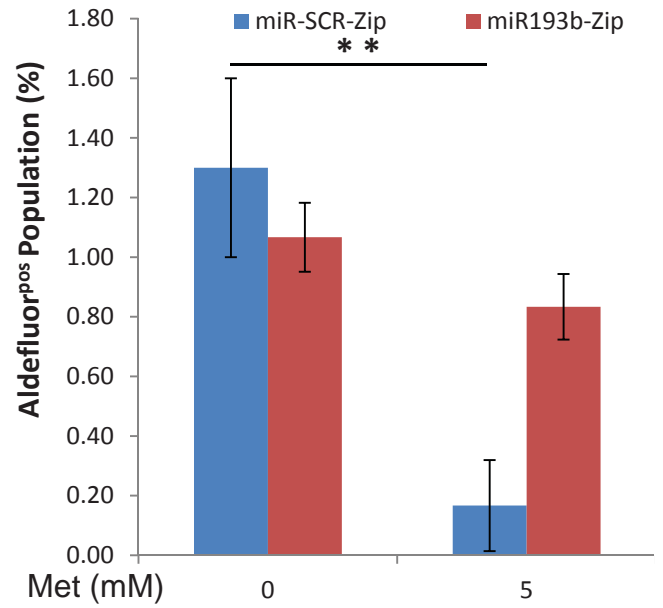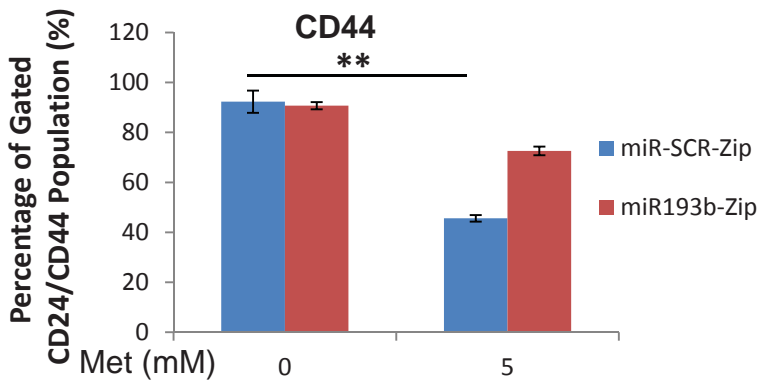

## A BT-549

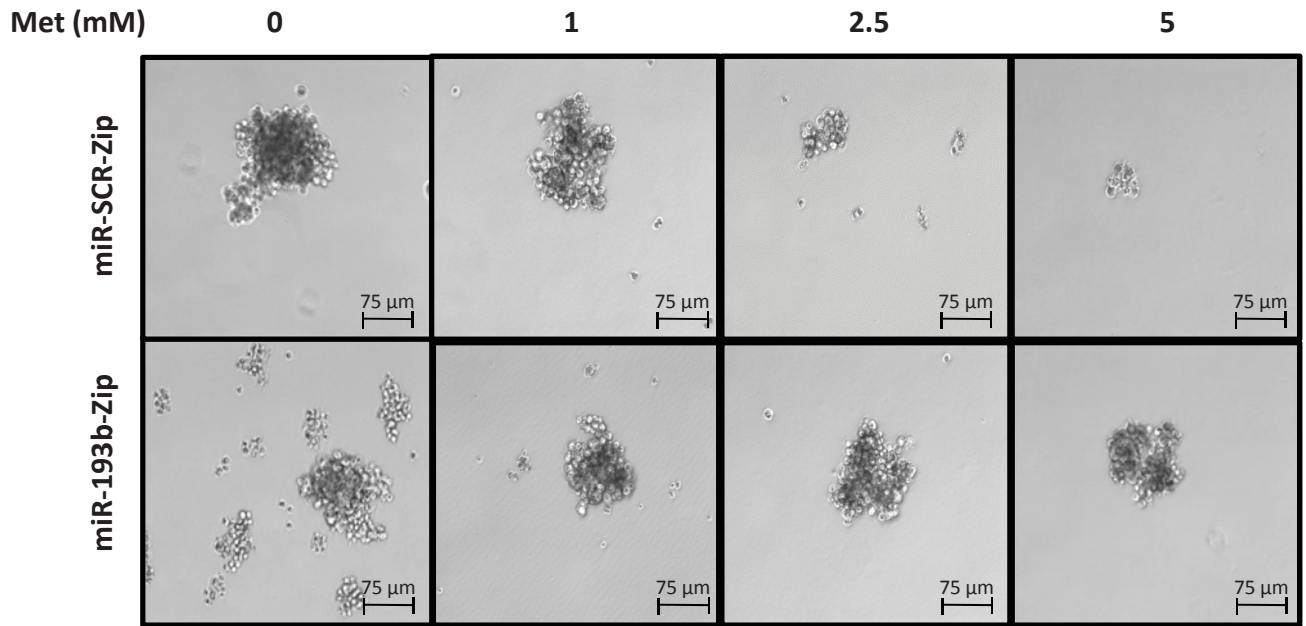

## B MDA-MB-231

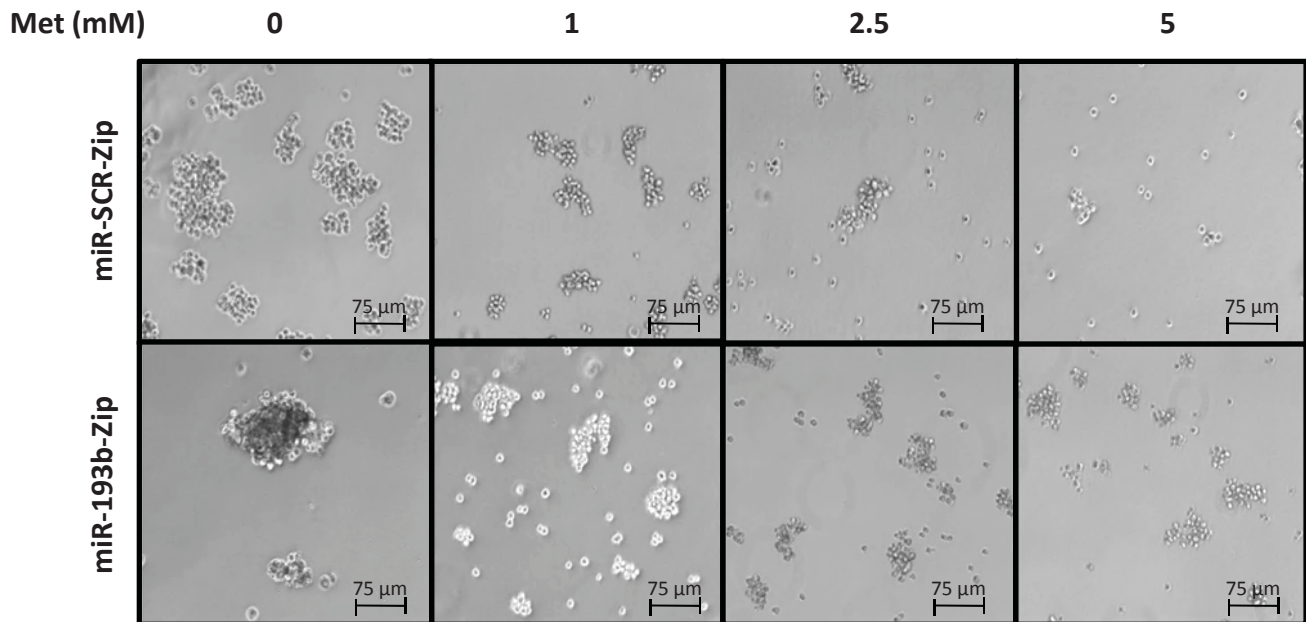



# A BT-549

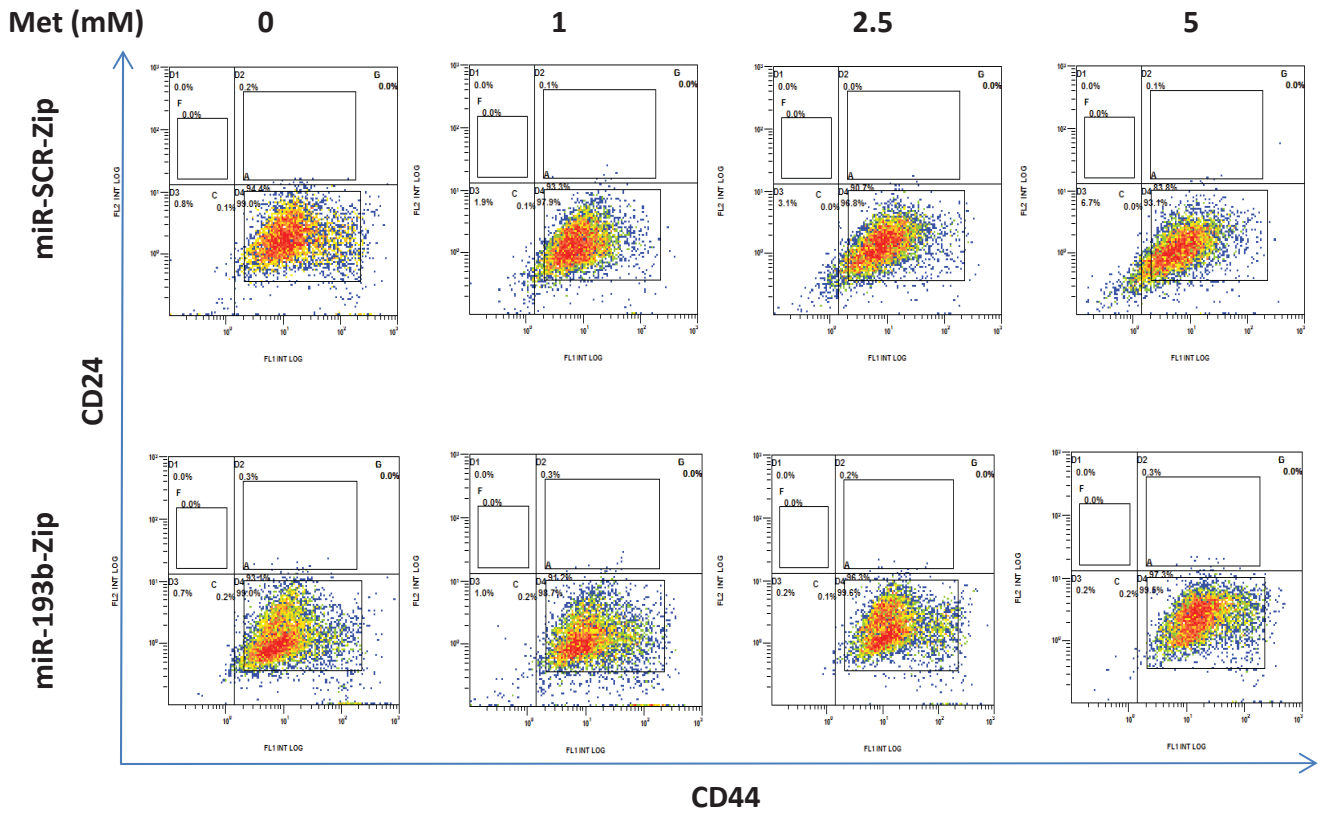

# B MDA-MB-231

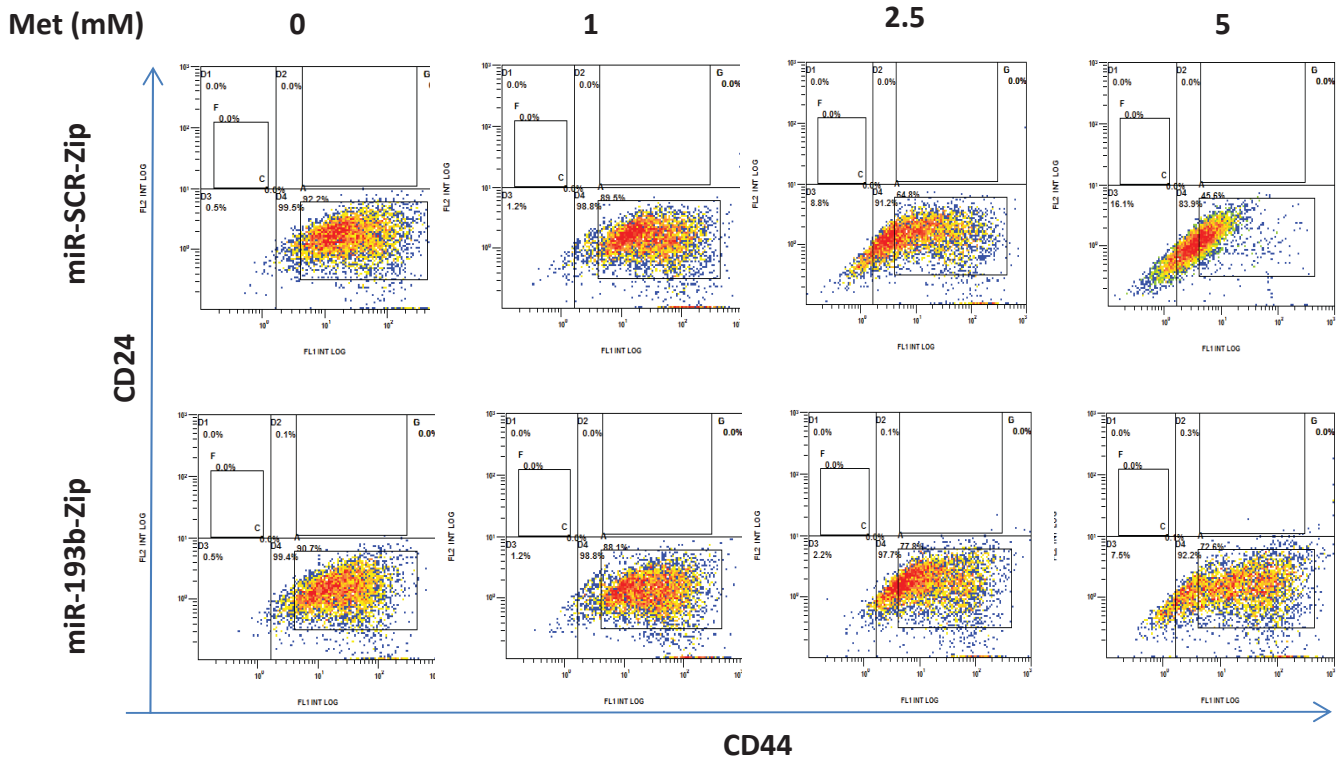

**A**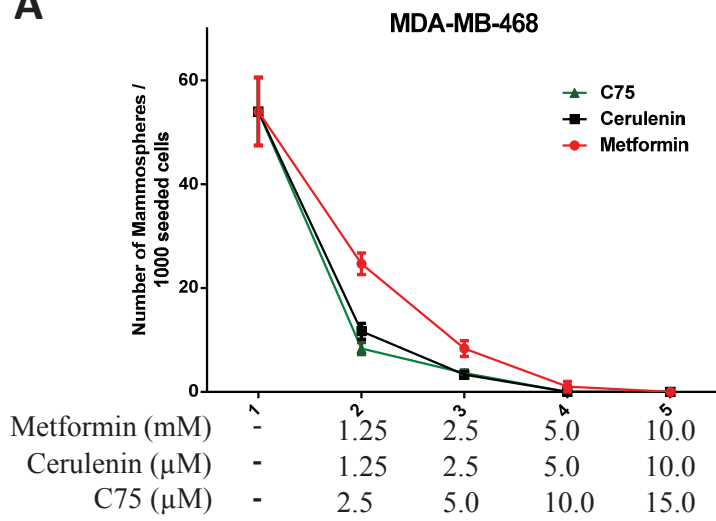**B**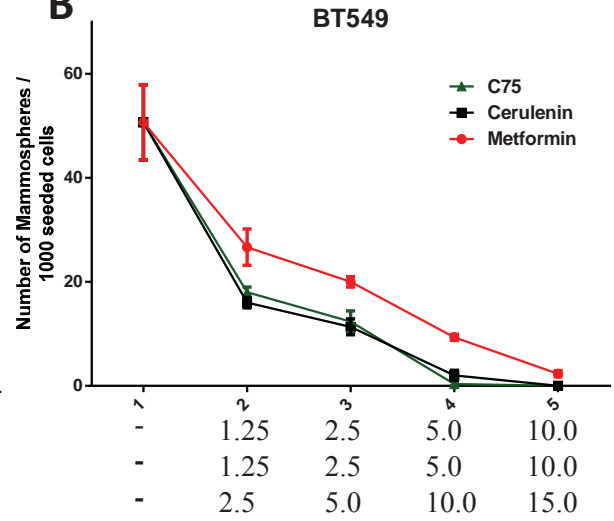**C**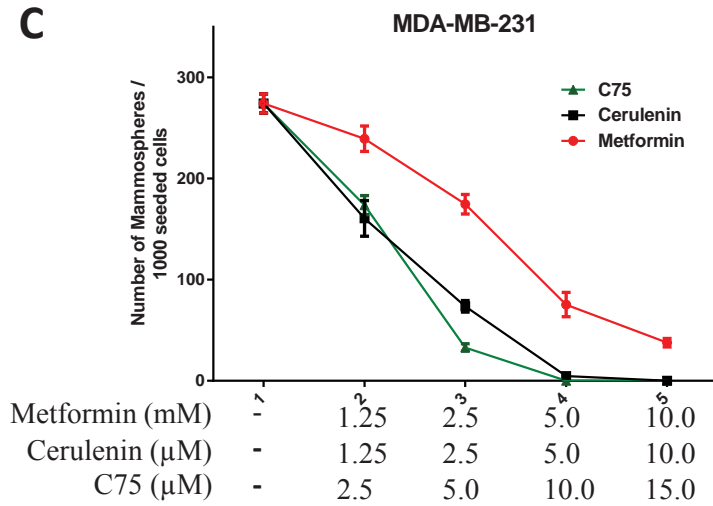**D**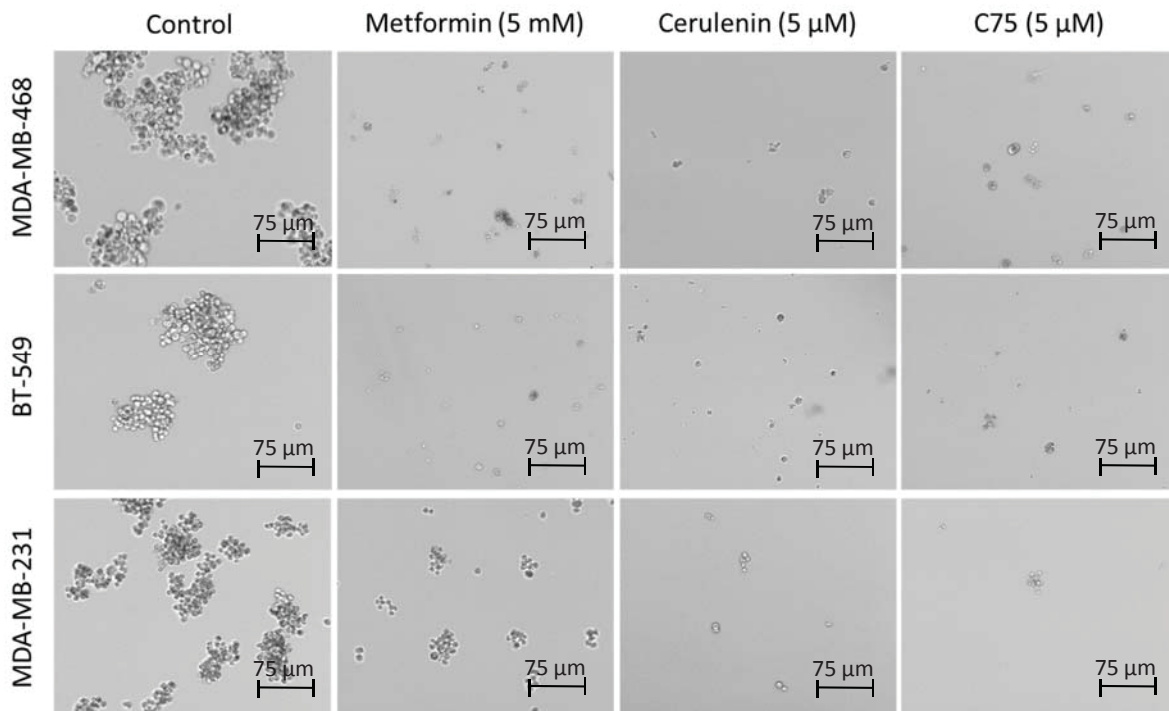

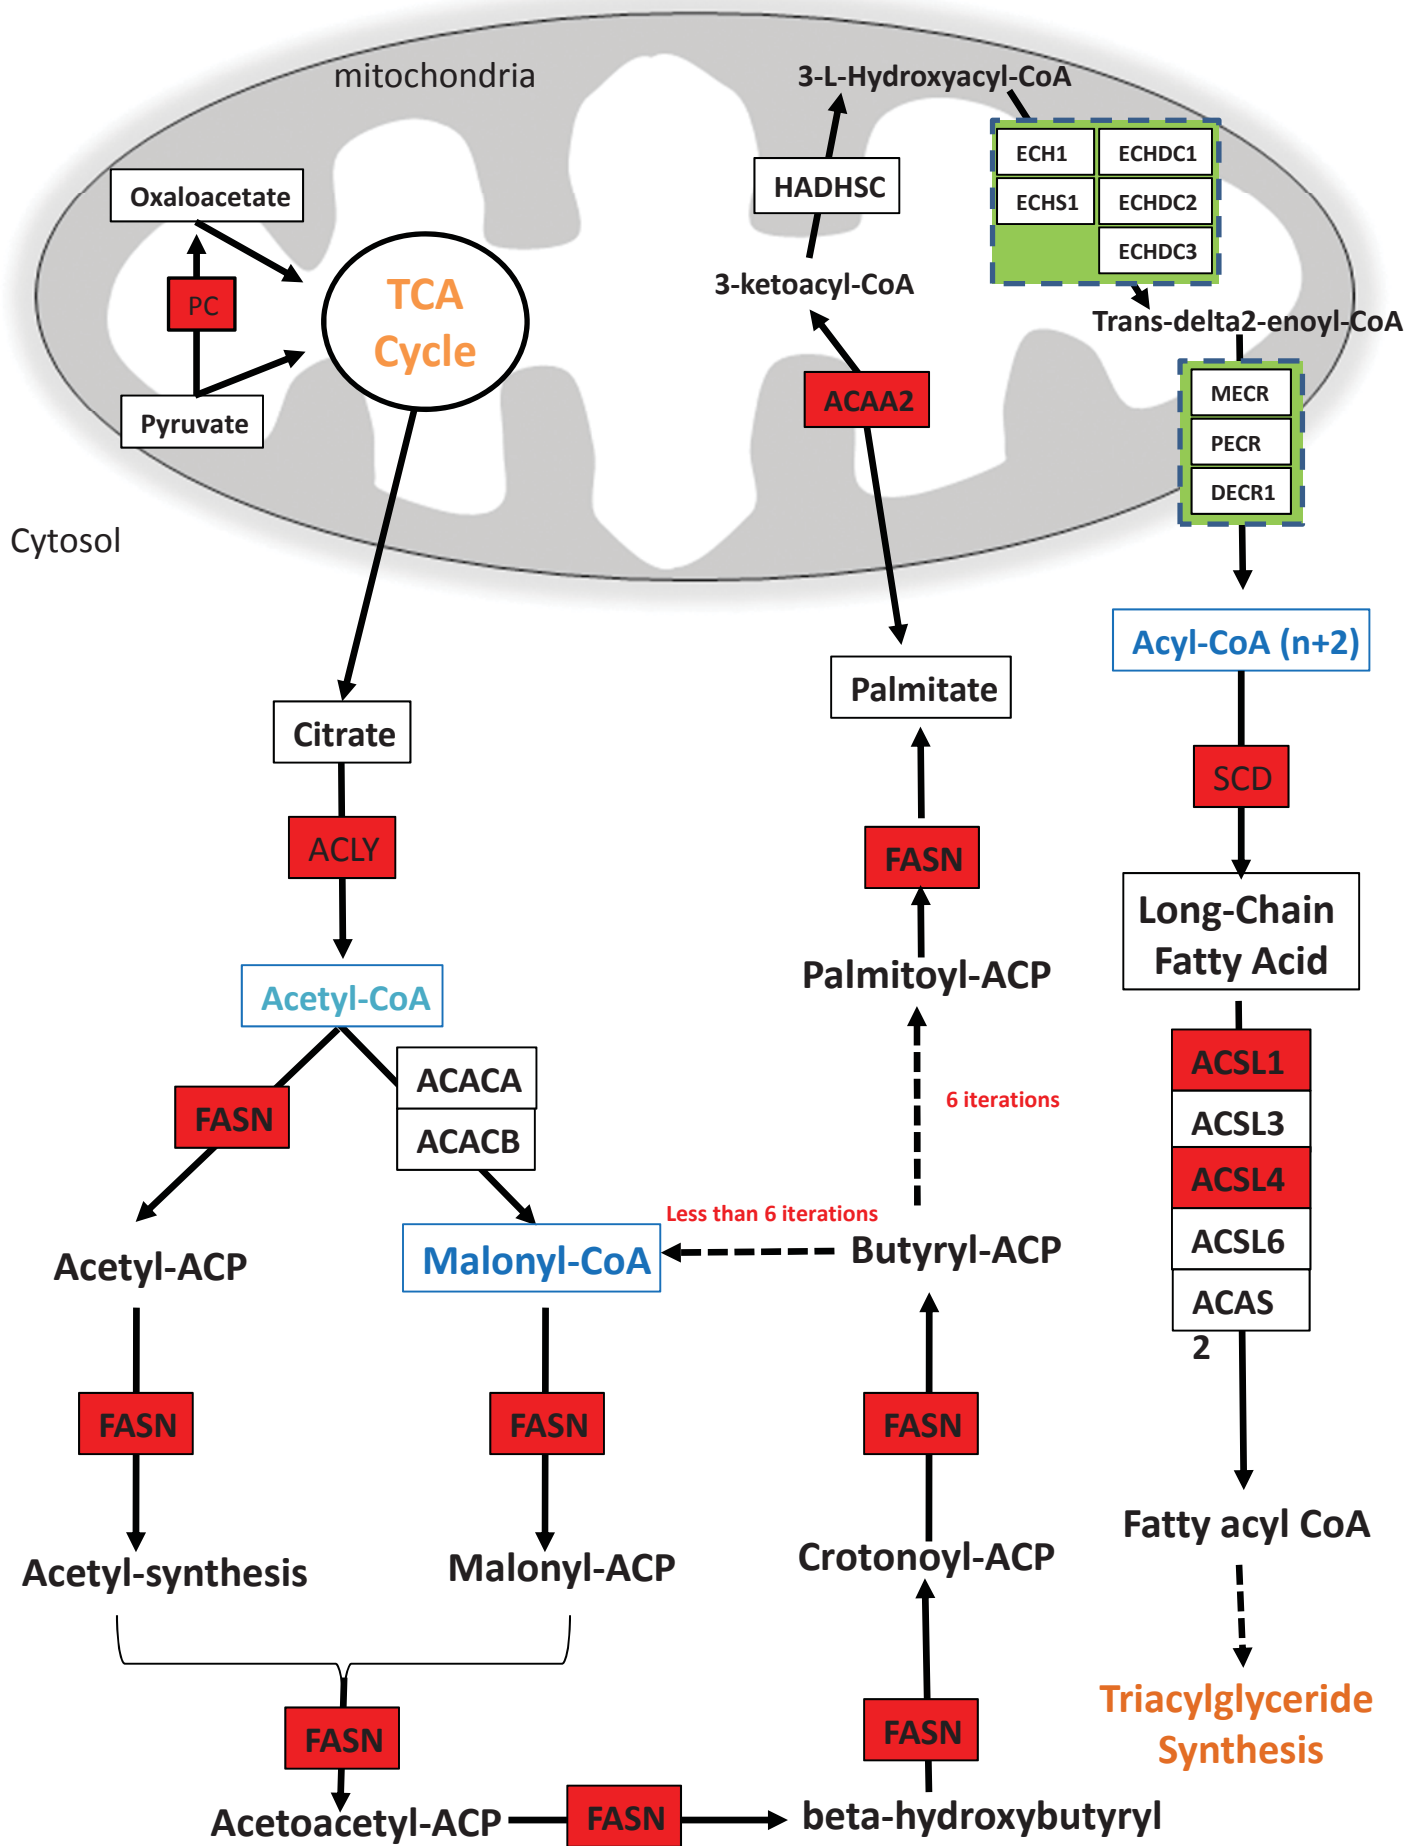

Supplemental Figure 8

Supplement: 12672_2014_188_MOESM1_ESM.pdf [file 12672_2014_188_MOESM1_ESM.pdf]
